# Supplementary material for: Maternal mortality in Mexico, beyond millennial development objectives: An age-period-cohort model
Source: PLoS One. 2018 Mar 21;13(3):e0194607. doi: 10.1371/journal.pone.0194607 (PMC5862485; doi:10.1371/journal.pone.0194607)
Supplement: S1 Table — (DOCX) [file pone.0194607.s002.docx]

**S1. Table. Age-Period-Cohort model**

|  |
| --- |
|  |
|  |
| **Where:** |
| , logarithm of the expected value of mortality rate or incidence |
| , represents the average effect |
| , represents the age effect |
| , represents the period effect |
| , is the cohort variable |

Source: Own elaboration.
